# Supplementary material for: Gene Profile of Chemokines on Hepatic Stellate Cells of Schistosome-Infected Mice and Antifibrotic Roles of CXCL9/10 on Liver Non-Parenchymal Cells
Source: PubMed Central journal article supplement (PMC3414521; doi:10.1371/journal.pone.0042490), 2012-08-08
Supplement: pone.0042490.s001.pdf [file pone.0042490.s001.pdf]

|                       |                                                                                 |
|-----------------------|---------------------------------------------------------------------------------|
| human GAPDH           | Forward 5'-ATGCTGGCGCTGAGTACGTC-3'<br>Reverse 5'-CAGGGGTGCTAAGCAGTTGGT-3'       |
| human CCL2            | Forward 5'-CAGCCAGATGCAATCAATGCC-3'<br>Reverse 5'-TGGAATCCT GAACCCACTTCT-3'     |
| human CXCL9           | Forward 5'-CCAGTAGTGAGAAAGGGTCGC-3'<br>Reverse 5'-TGGGGCAAATTGTTTAAGGTCTT-3'    |
| human CXCL10          | Forward 5'-GTGGCATTCAAGGAGTACCTC-3'<br>Reverse 5'-GCCTTCGATTCTGGATTCAAGACA-3'   |
| human CCR2            | Forward 5'-GCCTT TTTACATAGCTCTTGGC-3'<br>Reverse 5'-AGGAGTCCTTGTGTAGTCACTTT-3'  |
| human CCR5            | Forward 5'-AGGGCTGTGAGGCTTATCTTC-3'<br>Reverse 5'-CACCTGCATAGCTTGGTCCA-3'       |
| human $\alpha$ -SMA   | Forward 5'- CAGGGCTGTTTTCCCATCCAT-3'<br>Reverse 5'- GCCATGTTCTATCGGGTACTTC-3'   |
| human Col1 $\alpha$ 1 | Forward 5'- CGGACGACCTGGTGAGAGA -3'<br>Reverse 5'- CATTGTGTCCCCTAATGCCTT-3'     |
| human Col3 $\alpha$ 1 | Forward 5'- TGGTCCCCAAGGTGTCAAAG -3'<br>Reverse 5'- GGGGGTCCTGGGTTACCATTA-3'    |
| mouse Col1 $\alpha$ 1 | Forward 5'-ACGTCCTGGTGAAGTTGGTC-3'<br>Reverse 5'-CAGGGAAGCCTCTTCTCCT-3'         |
| mouse Col3 $\alpha$ 1 | Forward 5'-TGGTCCTCAGGGTGTAAGG-3'<br>Reverse 5'-GTCCAGCATCACCTTTTGGT-3'         |
| mouse MMP9            | Forward 5'-GCTCATGTACCCGCTGTATAGCT-3'<br>Reverse 5'-CAGATACTGGATGCCGTCTATGTC-3' |
| mouse TIMP1           | Forward 5'-TGGGAAATGCCGAGATATC-3'<br>Reverse 5'-TGGGACTTGTGGGCATATCC-3'         |
| mouse GAPDH           | Forward 5'-TGGAAAGCTGTGGCGTGAT-3'<br>Reverse 5'-TGCTTCACCACCTTCTTGAT-3'         |
| mouse TGF- $\beta$    | Forward 5'-CACCGGAGAGCCCTGGATA-3'<br>Reverse 5'-TGTACAGCTGCCGCACACA-3'          |
