# Supplementary material for: Gene Profile of Chemokines on Hepatic Stellate Cells of Schistosome-Infected Mice and Antifibrotic Roles of CXCL9/10 on Liver Non-Parenchymal Cells
Source: PubMed Central journal article supplement (PMC3414521; doi:10.1371/journal.pone.0042490), 2012-08-08
Supplement: pone.0042490.s002.pdf [file pone.0042490.s002.pdf]

**Supplementary Table2. Evaluation of schistosoma egg granuloma and liver fibrosis in different stages of schistosomiasis**

| Groups                                                              | 0 week | 3 weeks | 6 weeks  | 12 weeks | 18 weeks | 12 weeks PZQ | 18 weeks PZQ        |
|---------------------------------------------------------------------|--------|---------|----------|----------|----------|--------------|---------------------|
| Measurement of single schistosoma egg granuloma ( $\mu\text{m}^2$ ) |        |         |          |          |          |              |                     |
| Average of area                                                     | 0      | 0       | 60418.64 | 48661.99 | 16899.34 | 37125.65 *   | 14073.18            |
| standard deviation                                                  | 0      | 0       | 28091.28 | 24506.14 | 11149.82 | 19512.78     | 10284.33            |
| Percentage of Sirius Red areas (%)                                  |        |         |          |          |          |              |                     |
| Percentage                                                          | 0.673  | 0.684   | 10.709   | 18.591   | 14.294   | 14.214*      | 11.571 <sup>#</sup> |
| standard deviation                                                  | 0.061  | 0.058   | 1.390    | 1.685    | 1.442    | 1.104        | 1.406               |

\*: P<0.05, compared to 12 weeks group

#: P<0.05, compared to 18 weeks group
