# Supplementary material for: Gene Profile of Chemokines on Hepatic Stellate Cells of Schistosome-Infected Mice and Antifibrotic Roles of CXCL9/10 on Liver Non-Parenchymal Cells
Source: PubMed Central journal article supplement (PMC3414521; doi:10.1371/journal.pone.0042490), 2012-08-08
Supplement: pone.0042490.s003.pdf [file pone.0042490.s003.pdf]

| Cluster | Top Higher level Biological Functions/ Disorders | P-value                                     |
|---------|--------------------------------------------------|---------------------------------------------|
| 1       | 1. Inflammatory Response                         | $1.07 \times 10^{-9} - 6.72 \times 10^{-3}$ |
|         | 2. Cancer                                        | $8.76 \times 10^{-8} - 6.24 \times 10^{-3}$ |
|         | 3. Immunological Disease                         | $9.63 \times 10^{-8} - 6.76 \times 10^{-3}$ |
|         | 4. Inflammatory Disease                          | $4.40 \times 10^{-7} - 6.24 \times 10^{-3}$ |
|         | 5. Neurological Disease                          | $4.40 \times 10^{-7} - 5.55 \times 10^{-3}$ |
| 2       | 1. Cancer                                        | $8.26 \times 10^{-6} - 4.78 \times 10^{-2}$ |
|         | 2. Inflammatory Response                         | $1.71 \times 10^{-5} - 4.94 \times 10^{-2}$ |
|         | 3. Immunological Disease                         | $8.46 \times 10^{-5} - 4.31 \times 10^{-2}$ |
|         | 4. Cardiovascular Disease                        | $2.38 \times 10^{-4} - 4.94 \times 10^{-2}$ |
|         | 5. Ophthalmic Disease                            | $3.70 \times 10^{-4} - 1.66 \times 10^{-2}$ |
| 3       | 1. Immunological Disease                         | $7.13 \times 10^{-4} - 2.68 \times 10^{-2}$ |
|         | 2. Ophthalmic Disease                            | $2.10 \times 10^{-3} - 2.10 \times 10^{-3}$ |
|         | 3. Organismal Injury and Abnormalities           | $2.10 \times 10^{-3} - 2.68 \times 10^{-2}$ |
|         | 4. Developmental Disorder                        | $9.97 \times 10^{-3} - 3.95 \times 10^{-2}$ |
|         | 5. Inflammatory Response                         | $9.97 \times 10^{-3} - 3.91 \times 10^{-2}$ |
| 4       | 1. Inflammatory Response                         | $7.43 \times 10^{-6} - 4.42 \times 10^{-2}$ |
|         | 2. Connective Tissue Disorders                   | $3.07 \times 10^{-5} - 2.24 \times 10^{-2}$ |
|         | 3. Inflammatory Disease                          | $3.07 \times 10^{-5} - 4.26 \times 10^{-2}$ |
|         | 4. Skeletal and Muscular Disorders               | $3.07 \times 10^{-5} - 3.02 \times 10^{-2}$ |
|         | 5. Hematological Disease                         | $4.06 \times 10^{-4} - 4.32 \times 10^{-2}$ |
| 5       | 1. Dermatological Diseases and Conditions        | $1.04 \times 10^{-4} - 4.94 \times 10^{-2}$ |
|         | 2. Organismal Injury and Abnormalities           | $1.04 \times 10^{-4} - 4.08 \times 10^{-2}$ |
|         | 3. Inflammatory Response                         | $2.43 \times 10^{-4} - 4.43 \times 10^{-2}$ |
|         | 4. Immunological Disease                         | $8.90 \times 10^{-4} - 4.43 \times 10^{-2}$ |
|         | 5. Genetic Disorder                              | $1.22 \times 10^{-3} - 2.05 \times 10^{-2}$ |
| 6       | 1. Dermatological Diseases and Conditions        | $9.47 \times 10^{-4} - 3.17 \times 10^{-2}$ |
|         | 2. Organismal Injury and Abnormalities           | $9.47 \times 10^{-4} - 4.76 \times 10^{-2}$ |
|         | 3. Infectious Disease                            | $1.37 \times 10^{-3} - 4.40 \times 10^{-2}$ |
|         | 4. Inflammatory Response                         | $1.81 \times 10^{-3} - 4.11 \times 10^{-2}$ |
|         | 5. Cancer                                        | $2.88 \times 10^{-3} - 4.70 \times 10^{-2}$ |
| 7       | 1. Organismal Injury and Abnormalities           | $7.34 \times 10^{-4} - 4.70 \times 10^{-2}$ |
|         | 2. Psychological Disorders                       | $1.83 \times 10^{-3} - 1.83 \times 10^{-3}$ |
|         | 3. Cardiovascular Disease                        | $2.16 \times 10^{-3} - 4.70 \times 10^{-2}$ |
|         | 4. Inflammatory Disease                          | $2.16 \times 10^{-3} - 2.78 \times 10^{-2}$ |
|         | 5. Inflammatory Response                         | $2.16 \times 10^{-3} - 3.93 \times 10^{-2}$ |
