# Supplementary material for: Gene Profile of Chemokines on Hepatic Stellate Cells of Schistosome-Infected Mice and Antifibrotic Roles of CXCL9/10 on Liver Non-Parenchymal Cells
Source: PubMed Central journal article supplement (PMC3414521; doi:10.1371/journal.pone.0042490), 2012-08-08
Supplement: pone.0042490.s004.pdf [file pone.0042490.s004.pdf]

| Cluster  | Top Canonical Pathways                                         | P-value                |
|----------|----------------------------------------------------------------|------------------------|
| <b>1</b> | 1. Cell Cycle Control of Chromosomal Replication               | $1.14 \times 10^{-7}$  |
|          | 2. Communication between Innate and Adaptive Immune Cells      | $3.13 \times 10^{-5}$  |
|          | 3. Mismatch Repair in Eukaryotes                               | $5.19 \times 10^{-5}$  |
|          | 4. Altered T Cell and B Cell Signaling in Rheumatoid Arthritis | $1.2 \times 10^{-4}$   |
|          | 5. Crosstalk between Dendritic Cells and Natural Killer Cells  | $2.32 \times 10^{-4}$  |
| <b>2</b> | 1. Oxidative Phosphorylation                                   | $8.72 \times 10^{-20}$ |
|          | 2. Ubiquinone Biosynthesis                                     | $2.81 \times 10^{-14}$ |
|          | 3. Mitochondrial Dysfunction                                   | $3.02 \times 10^{-13}$ |
|          | 4. HIF1a Signaling                                             | $1.32 \times 10^{-7}$  |
|          | 5. Bladder Cancer Signaling                                    | $4.56 \times 10^{-5}$  |
| <b>3</b> | 1. Galactose Metabolism                                        | $6.2 \times 10^{-4}$   |
|          | 2. Propanoate Metabolism                                       | $1.55 \times 10^{-2}$  |
|          | 3. Butanoate Metabolism                                        | $1.66 \times 10^{-2}$  |
|          | 4. PPARa/RXRa Activation                                       | $1.72 \times 10^{-2}$  |
|          | 5. Pyruvate Metabolism                                         | $2.33 \times 10^{-2}$  |
| <b>4</b> | 1. Acute Phase Response Signaling                              | $1.02 \times 10^{-3}$  |
|          | 2. PI3K/AKT Signaling                                          | $3.03 \times 10^{-3}$  |
|          | 3. Nicotinate and Nicotinamide Metabolism                      | $3.07 \times 10^{-3}$  |
|          | 4. IL-10 Signaling                                             | $3.22 \times 10^{-3}$  |
|          | 5. Role of PI3K/AKT Signaling in the Pathogenesis of Influenza | $3.82 \times 10^{-3}$  |
| <b>5</b> | 1. Antigen Presentation Pathway                                | $6.55 \times 10^{-8}$  |
|          | 2. CD28 Signaling in T Helper Cells                            | $1.14 \times 10^{-6}$  |
|          | 3. Type I Diabetes Mellitus Signaling                          | $2.64 \times 10^{-6}$  |
|          | 4. Role of NFAT in Regulation of the Immune Response           | $9.54 \times 10^{-6}$  |
|          | 5. OX40 Signaling Pathway                                      | $1.05 \times 10^{-5}$  |
| <b>6</b> | 1. Valine, Leucine and Isoleucine Degradation                  | $4.36 \times 10^{-6}$  |
|          | 2. Xenobiotic Metabolism Signaling                             | $2.44 \times 10^{-4}$  |
|          | 3. Lysine Degradation                                          | $3.41 \times 10^{-4}$  |
|          | 4. Bile Acid Biosynthesis                                      | $5.52 \times 10^{-4}$  |
|          | 5. Molecular Mechanisms of Cancer                              | $7.02 \times 10^{-4}$  |
| <b>7</b> | 1. Sphingolipid Metabolism                                     | $1.22 \times 10^{-4}$  |
|          | 2. N-Glycan Degradation                                        | $2.64 \times 10^{-3}$  |
|          | 3. Glutathione Metabolism                                      | $2.71 \times 10^{-3}$  |
|          | 4. Starch and Sucrose Metabolism                               | $5.12 \times 10^{-3}$  |
|          | 5. Glutamate Metabolism                                        | $6.51 \times 10^{-3}$  |
